# Supplementary material for: Astaxanthin prevents and reverses diet-induced insulin resistance and steatohepatitis in mice: A comparison with vitamin E
Source: PubMed Central journal article supplement (PMC4658633; doi:10.1038/srep17192), 2015-11-25
Supplement: srep17192-s1.pdf [file srep17192-s1.pdf]

Supplementary Information

**Astaxanthin prevents and reverses diet-induced insulin resistance and steatohepatitis in mice: A comparison with vitamin E**

Yinhua Ni,<sup>1,2</sup> Mayumi Nagashimada,<sup>1</sup> Fen Zhuge,<sup>1</sup> Lili Zhan,<sup>1</sup> Naoto Nagata,<sup>1</sup> Akemi Tsutsui,<sup>3</sup> Yasuni Nakanuma,<sup>3</sup> Shuichi Kaneko,<sup>2</sup> Tsuguhito Ota<sup>1,2,\*</sup>

<sup>1</sup>Department of Cell Metabolism and Nutrition, Brain/Liver Interface Medicine Research Center, Kanazawa University, Kanazawa, Ishikawa 920-8640, Japan

<sup>2</sup>Department of Disease Control and Homeostasis, Kanazawa University Graduate School of Medical Science, Kanazawa, Ishikawa 920-8640, Japan

<sup>3</sup>Department of Pathology, Kanazawa University Graduate School of Medical Science, Kanazawa, Ishikawa 920-8640, Japan

**a**

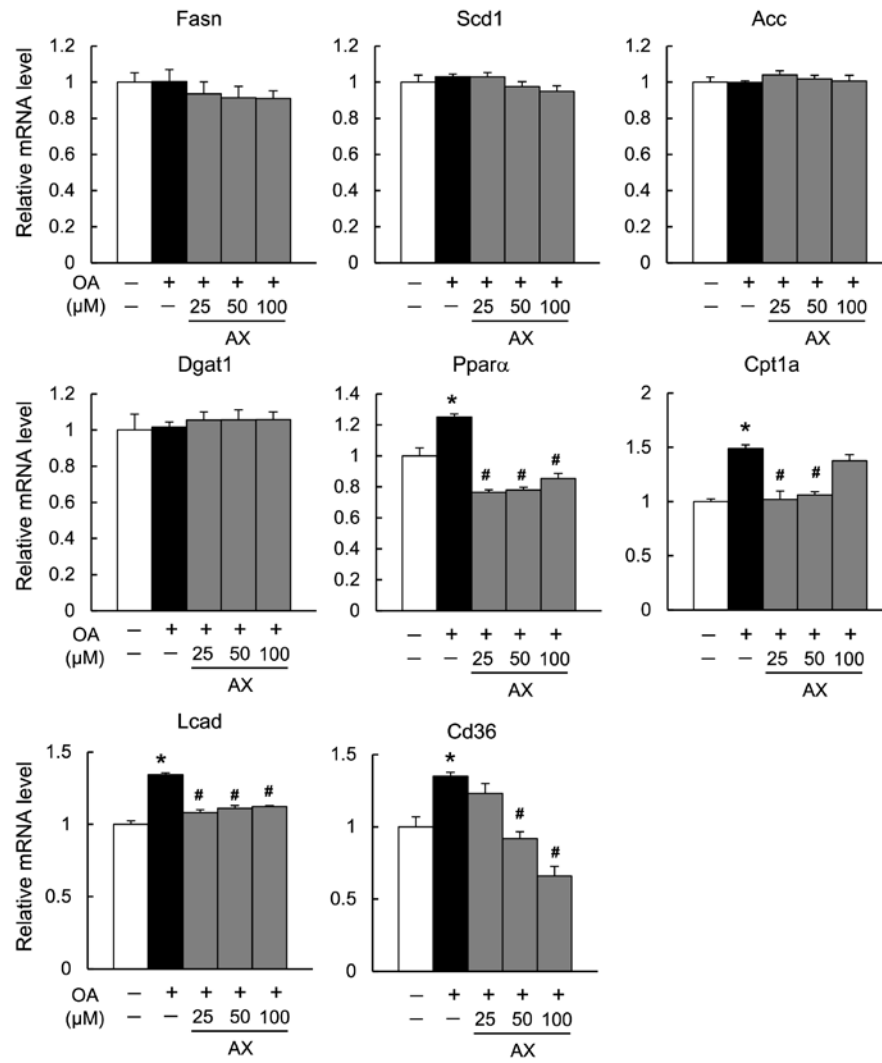

**b**

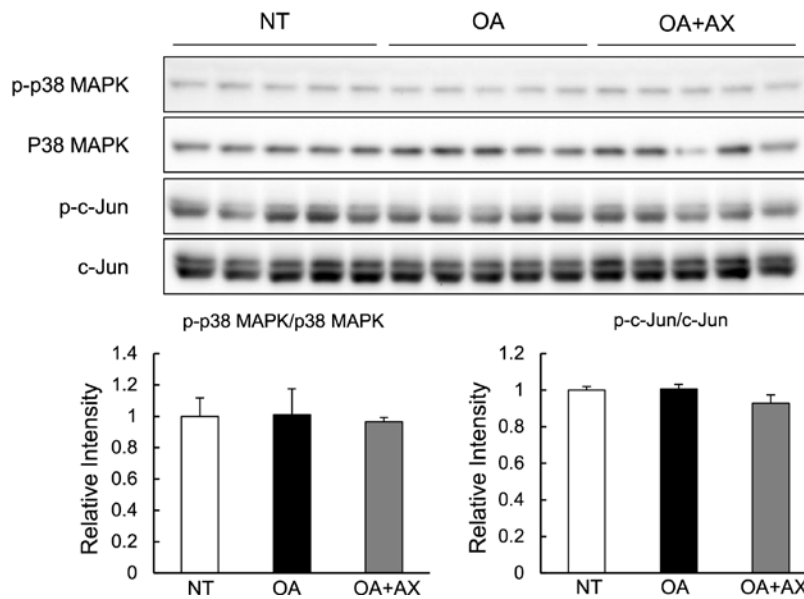

**Figure S1.** Effect of astaxanthin on lipid metabolism in hepatocytes. Primary hepatocytes were treated with 400  $\mu\text{M}$  oleic acid (OA) and astaxanthin (25, 50, 100  $\mu\text{M}$ ) for 16 h. (a) mRNA expression of lipogenic and fatty acid oxidation genes in hepatocytes ( $n = 6$ ).  $*P < 0.05$ , vs. control incubation;  $\#P < 0.05$  vs. OA-treated cells. (b) Immunoblots and quantification of p-p38MAPK and p-c-Jun levels in hepatocytes treated with OA and 100  $\mu\text{M}$  astaxanthin ( $n = 5$ ).

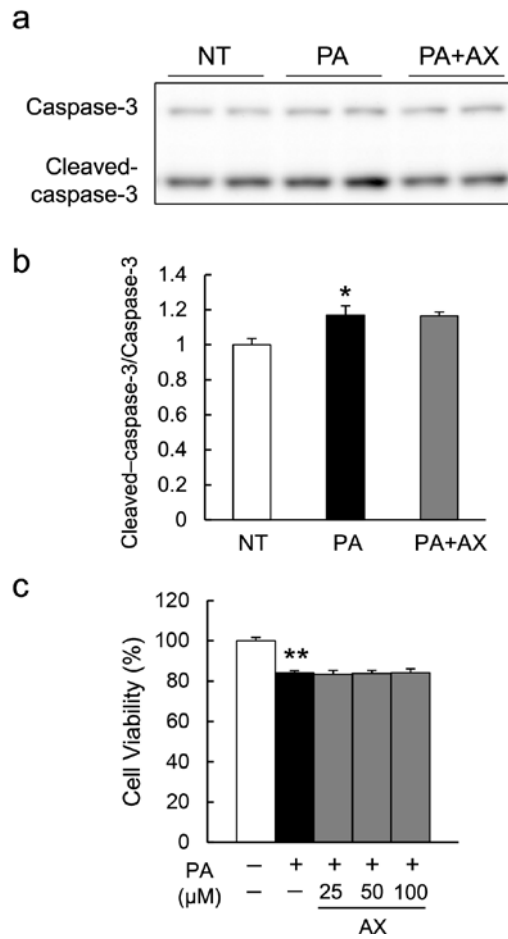

**Figure S2.** Astaxanthin had no effect on apoptosis and viability of hepatocytes. Primary hepatocytes were treated with 400  $\mu\text{M}$  palmitic acid (PA) and astaxanthin (25, 50, 100  $\mu\text{M}$ ) for 16 h. (a, b) Immunoblots and quantification of cleaved-caspase-3 and caspase-3 in hepatocytes treated with PA and 100  $\mu\text{M}$  astaxanthin ( $n = 6$ ). \* $P < 0.05$  vs. NT. (c) Viability of hepatocytes treated with PA and astaxanthin ( $n = 8$ ). \*\* $P < 0.01$  vs. control.

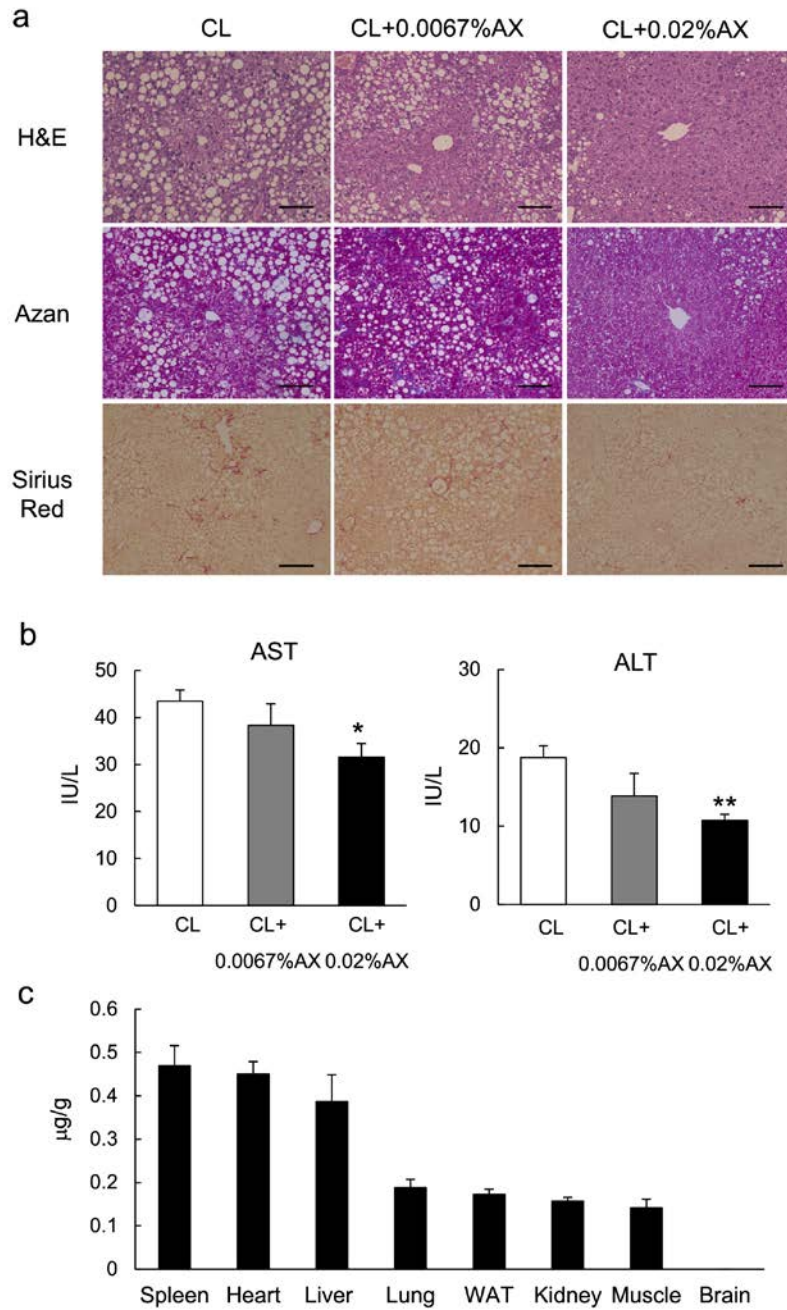

**Figure S3.** Dose-dependent effects of astaxanthin on the prevention of diet-induced NASH. (a) H&E, Azan, and Sirius Red-stained liver sections; scale bars = 100  $\mu$ m. (b) Plasma AST and ALT levels ( $n = 8$ ). \* $P < 0.05$ , \*\* $P < 0.01$  vs. mice fed the CL diet. (c) The astaxanthin concentrations in various tissues were measured using HPLC ( $n = 5$ ).

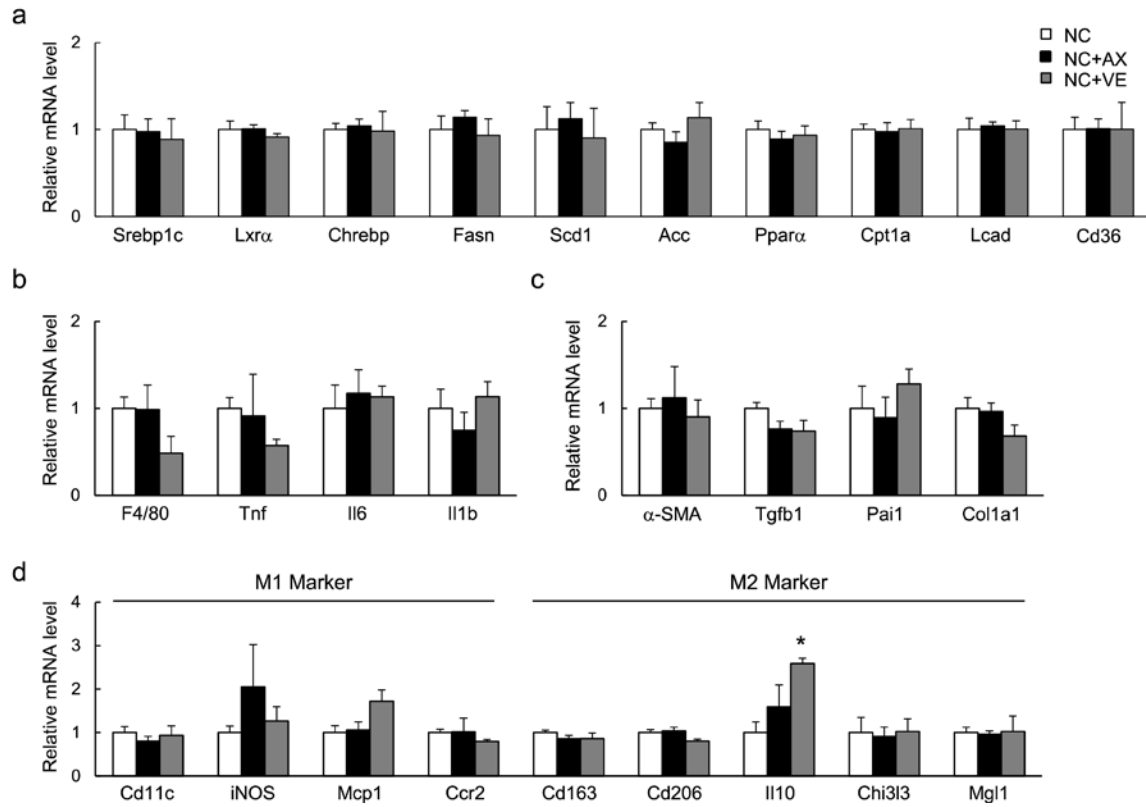

**Figure S4.** Astaxanthin had little effect on gene expression in the livers of NC-fed mice.

(a) mRNA expression of lipogenic and fatty acid oxidation genes. (b) mRNA expression of *F4/80* and inflammatory cytokines. (c) mRNA expression of fibrogenic genes. (d) mRNA expression of M1 and M2 macrophage markers ( $n = 5/\text{group}$ ). \* $P < 0.05$  vs. the NC group.

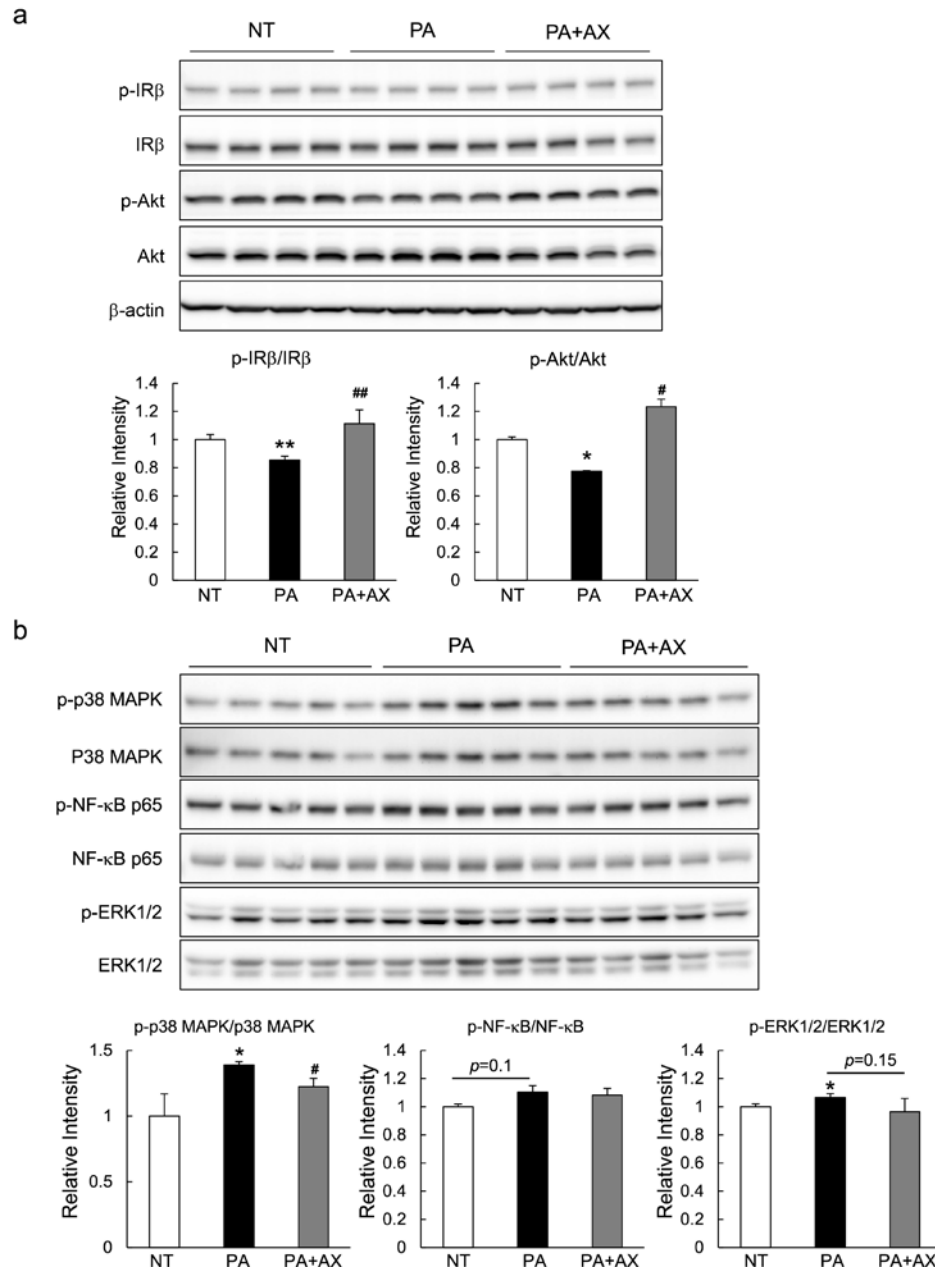

**Figure S5.** Astaxanthin enhanced insulin signaling in primary hepatocytes. Primary hepatocytes were pretreated with 400  $\mu$ M palmitic acid (PA) and 100  $\mu$ M astaxanthin for 16 h and insulin was then added for 10 min to assess insulin signaling. (a) Immunoblots and quantification of p-IR $\beta$  and p-Akt levels in hepatocytes ( $n = 4$ ). (b) Immunoblots and quantification of p-p38MAPK, p-NF- $\kappa$ B p65 and p-ERK levels in hepatocytes ( $n = 5$ ). \* $P < 0.05$ , \*\* $P < 0.01$ , vs. NT; # $P < 0.05$ , ## $P < 0.01$  vs. PA-treated cells.

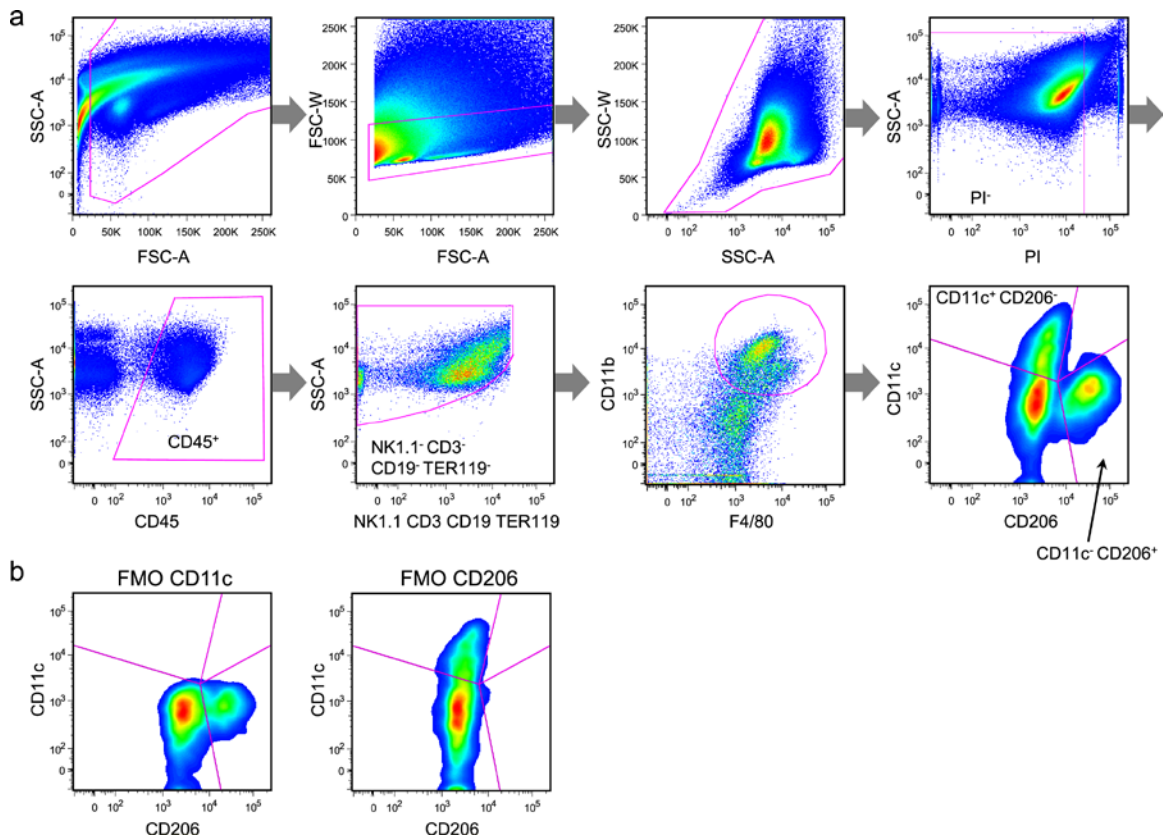

**Figure S6.** Sequential gating strategy for analysis of M1- and M2-type macrophages in mouse livers. (a) FACS plots of the non-parenchymal liver cell fraction isolated from mice fed the CL, CL+AX, or CL+VE diet for 12 weeks. After excluding cell debris, doublets, and dead cells using FSC/SSC parameters and propidium iodide (PI) staining, macrophages were identified as PI<sup>-</sup> CD45<sup>+</sup> NK1.1<sup>-</sup> CD3<sup>-</sup> CD19<sup>-</sup> TER119<sup>-</sup> CD11b<sup>+</sup> F4/80<sup>+</sup> cells. M1 and M2 macrophages were gated as CD11c<sup>+</sup> CD206<sup>-</sup> and CD11c<sup>-</sup> CD206<sup>+</sup>, respectively. (b) FACS plot of “fluorescence minus one” (FMO) controls for CD11c (left) and CD206 (right). FMO controls were used for gating to identify highly pure populations of M1- or M2-type macrophages.



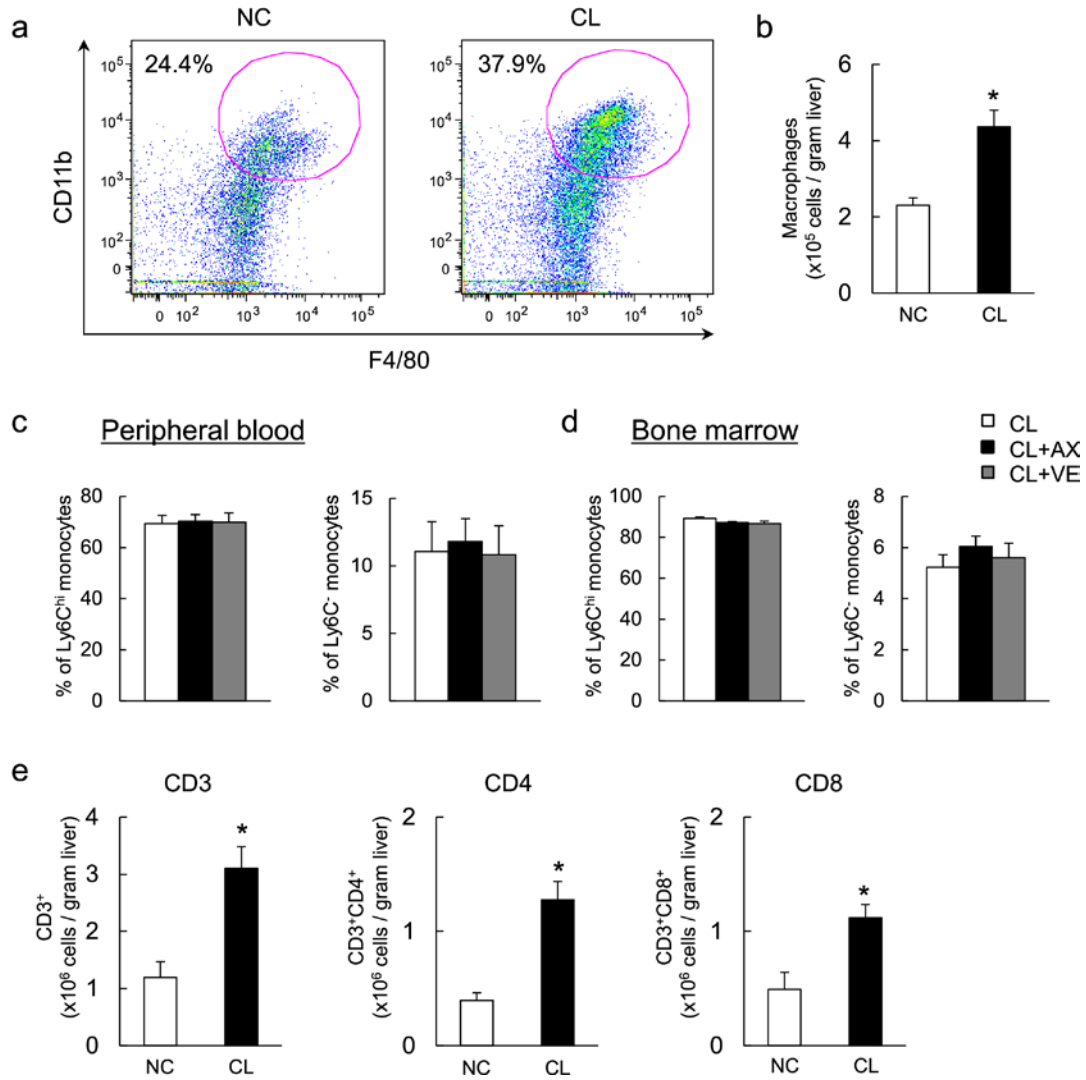

**Figure S7.** FACS of liver macrophages, T cells, and blood and bone marrow Ly6C<sup>hi</sup> and Ly6C<sup>-</sup> monocytes. (a) Representative plot demonstrating that a CL diet induced the accumulation of liver macrophages in mice. (b) Quantitation of liver macrophages in the livers of NC- or CL-diet-fed mice ( $n = 8$ ). \* $P < 0.05$  vs. mice fed the NC diet. (c, d) Percentage of Ly6C<sup>hi</sup> and Ly6C<sup>-</sup> monocytes in the peripheral blood and bone marrow of mice fed the CL, CL+AX, or CL+VE diet ( $n = 8$ ). Monocytes were defined as CD45<sup>+</sup> CD11b<sup>+</sup> Gr1<sup>-</sup> CD3<sup>-</sup> CD19<sup>-</sup> NK1.1<sup>-</sup> cells. (e) Quantitation of CD3<sup>+</sup>, CD4<sup>+</sup>, CD8<sup>+</sup> T cells in liver ( $n = 8$ ). \* $P < 0.01$  vs. mice fed the NC diet.

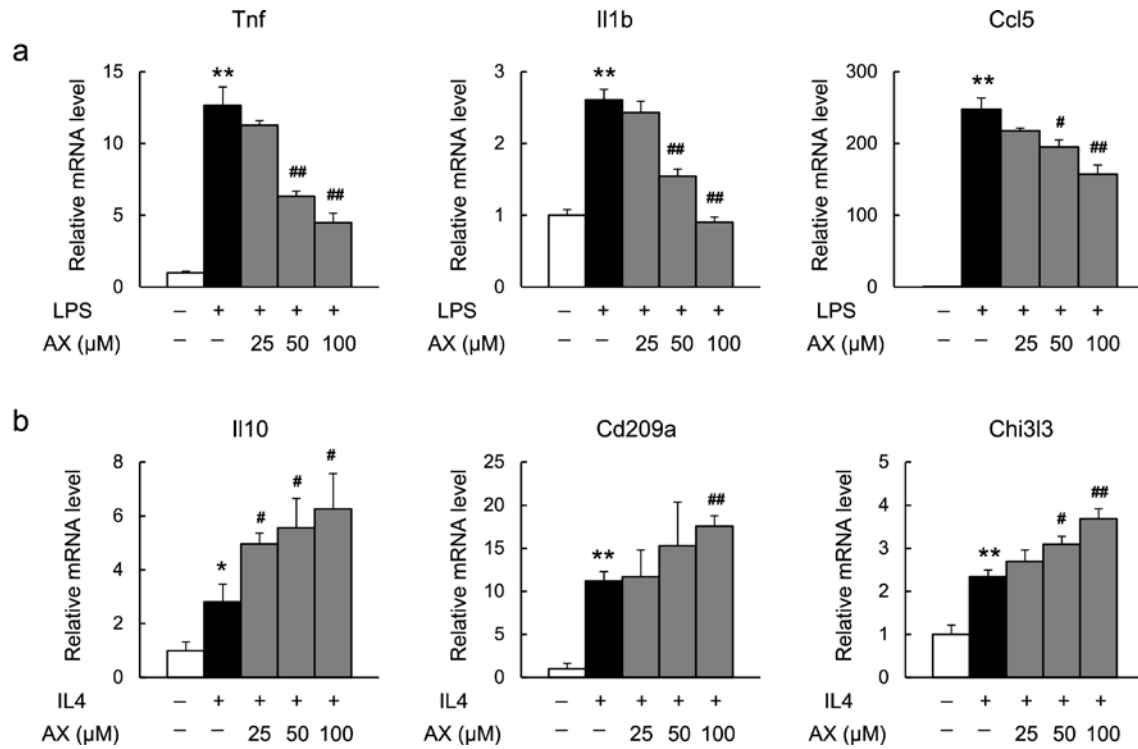

**Figure S8.** Astaxanthin inhibited M1 macrophage activation and enhanced M2 macrophage activation *in vitro*. Astaxanthin suppressed LPS-induced M1 marker mRNA expression (a) but augmented IL-4-induced M2 marker mRNA expression (b) *in vitro*. RAW264.7 macrophages were serum-starved for 6 h, and then co-incubated with LPS (1 μg/mL) or IL-4 (10 ng/mL) and astaxanthin (25–100 μM) for 24 h ( $n = 6$ ). \* $P < 0.05$ , \*\* $P < 0.01$  vs. control; # $P < 0.05$ , ## $P < 0.01$  vs. LPS- or IL-4-stimulated cells.

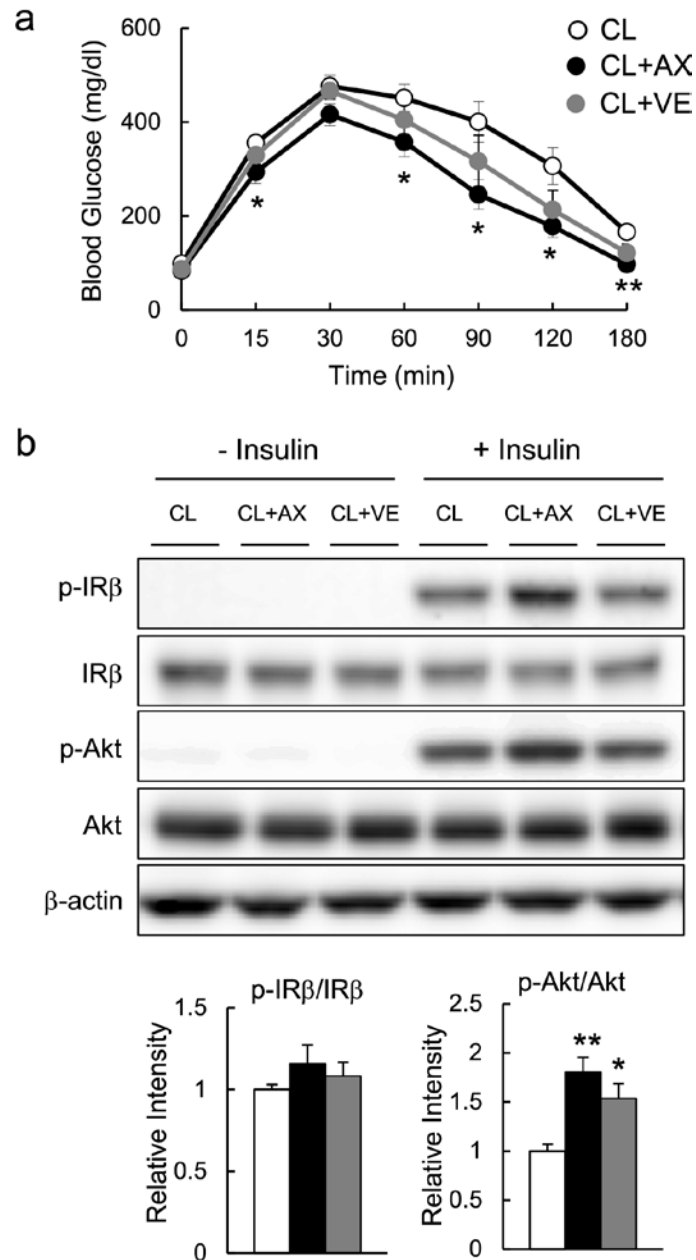

**Figure S9.** The therapeutic effects of astaxanthin and vitamin E in NASH. (a) GTTs in mice fed the CL, CL+AX, or CL+VE diet ( $n = 8$ ). \* $P < 0.05$ , \*\* $P < 0.01$  CL+AX vs. CL group. (b) Hepatic insulin signaling ( $n = 4$ ). \* $P < 0.05$ , \*\* $P < 0.01$  vs. CL group.

**Table S1.** Effects of astaxanthin (AX) and vitamin E (VE) on metabolic parameters after 12 weeks of treatment.

|                                  | CL        | CL+AX       | CL+VE     |
|----------------------------------|-----------|-------------|-----------|
| Body weight (g)                  | 40.0±1.1  | 38.9±1.1    | 38.0±2.0  |
| Liver weight ratio (%)           | 5.49±0.19 | 5.32±0.21   | 5.49±0.21 |
| Plasma TG (mg/dL)                | 57.4±4.3  | 43.1±4.4*   | 50.4±2.5  |
| Plasma TC (mg/dL)                | 173.4±4.5 | 149.0±3.4*  | 165.0±4.2 |
| Plasma NEFA (mEq/L)              | 0.81±0.07 | 0.57±0.06*  | 0.66±0.10 |
| Plasma AST (IU/L)                | 44.3±4.3  | 26.5±1.7*   | 37.1±3.0  |
| Plasma ALT (IU/L)                | 16.8±1.3  | 12.1±1.2*   | 14.9±2.2  |
| Plasma insulin (fasting) (ng/mL) | 0.90±0.19 | 0.43±0.05*  | 0.49±0.18 |
| Plasma insulin (fed) (ng/mL)     | 1.56±0.08 | 1.01±0.12** | 1.28±0.15 |

Data were obtained from 32-week-old fasted mice, and are presented as means ± SEM ( $n = 8$ ). \* $P < 0.05$ , \*\* $P < 0.01$  vs. untreated CL-diet-fed mice.

**Table S2.** Plasma parameters of patients who completed the study at baseline and 6 months.

| Variable                  | Astaxanthin (n=7) |            |                       | Placebo (n=5) |            |                       |                       |
|---------------------------|-------------------|------------|-----------------------|---------------|------------|-----------------------|-----------------------|
|                           | Before            | After      | <i>p</i> <sup>a</sup> | Before        | After      | <i>p</i> <sup>a</sup> | <i>p</i> <sup>b</sup> |
| Male/female               | 3/4               |            |                       | 3/2           |            |                       |                       |
| Age (years)               | 50.0±6.2          |            |                       | 58.6±6.6      |            |                       |                       |
| BMI (kg/m <sup>2</sup> )  | 34.2±4.0          | 34.4±3.8   | 0.980                 | 26.5±1.9      | 26.3±1.9   | 0.944                 | 0.480                 |
| Glucose (mg/dL)           | 111.0±6.0         | 115.8±26.8 | 0.669                 | 121.3±11.7    | 120.5±13.9 | 0.968                 | 0.759                 |
| Insulin (μU/mL)           | 27.0±7.4          | 28.0±7.6   | 0.921                 | 11.3±2.1      | 11.8±4.1   | 0.908                 | 0.945                 |
| HOMA-IR                   | 7.1±1.8           | 7.4±1.5    | 0.900                 | 3.3±0.6       | 3.6±1.2    | 0.853                 | 0.979                 |
| HbA1c (%)                 | 6.5±0.3           | 6.9±0.4    | 0.396                 | 6.8±0.1       | 6.8±0.3    | 0.816                 | 0.118                 |
| γGTP (IU/L)               | 50.9±6.           | 47.3±6.0   | 0.695                 | 72.2±8.0      | 63.8±6.2   | 0.430                 | 0.497                 |
| AST (IU/L)                | 48.0±7.6          | 50.1±9.6   | 0.864                 | 42.4±5.6      | 33.4±6.1   | 0.311                 | 0.328                 |
| ALT (IU/L)                | 69.7±12.1         | 73.0±14.5  | 0.865                 | 64.2±12.3     | 48.0±10.9  | 0.352                 | 0.161                 |
| Free Fatty Acid (mEq/L)   | 0.54±0.06         | 0.58±0.07  | 0.668                 | 0.59±0.20     | 0.57±0.17  | 0.948                 | 0.822                 |
| Total Cholesterol (mg/dL) | 185.0±15.3        | 186.1±20.2 | 0.965                 | 146.2±22.5    | 157.8±25.8 | 0.743                 | 0.470                 |
| Triglyceride (mg/dL)      | 168.0±36.5        | 175.0±29.1 | 0.876                 | 101.0±26.0    | 104.0±14.1 | 0.927                 | 0.922                 |
| HDL-C (mg/dL)             | 39.1±2.5          | 40.4±3.3   | 0.762                 | 40.8±4.2      | 45.8±5.5   | 0.490                 | 0.345                 |

Data are expressed as means ± SEM

<sup>a</sup>*p* value for the intergroup comparison (baseline vs 6 months)

<sup>b</sup>*p* value for the intergroup comparison (changes from baseline between groups)

HDL-C, HDL-cholesterol

**Table S3.** Comparison of the mechanisms of action of astaxanthin and vitamin E.

|                                            | Astaxanthin | Vitamin E |
|--------------------------------------------|-------------|-----------|
| <b>Steatosis and lipid metabolism</b>      |             |           |
| Lipid accumulation                         | ↓↓          | ↓         |
| Lipogenesis                                | ↓↓          | ↓         |
| Lipid uptake                               | ↓           | →         |
| Fatty acid oxidation                       | →           | ↑         |
| Lipid peroxidation                         | ↓           | ↓         |
| <b>Inflammation and insulin resistance</b> |             |           |
| Macrophage/Kupffer cell accumulation       | ↓↓          | ↓         |
| Macrophage polarization                    | ↓↓M1, ↑↑M2  | ↓M1, ↑M2  |
| T-cell accumulation                        | ↓           | ↓         |
| Glucose tolerance and insulin sensitivity  | ↑           | →         |
| <b>Fibrosis</b>                            |             |           |
| Stellate cell activation                   | ↓↓          | ↓         |
| Fibrogenesis                               | ↓↓          | ↓         |

↓, Decreased or suppressed; ↑, increased or enhanced; →, unaffected.

**Table S4.** Primer sequence used for real-time PCR.

| Gene           | 5' Primer                       | 3' Primer                         |
|----------------|---------------------------------|-----------------------------------|
| <i>Srebp1c</i> | GGA GCC ATG GAT TGC ACA TT      | GGC CCG GGA AGT CAC TGT           |
| <i>Lxra</i>    | CTG CAG GAC AAA AAG CTT CC      | CCC TTC TCA GTC TGC TCC AC        |
| <i>Chrebp</i>  | GTC CGA TAT CTC CGA CAC ACT CTT | GTC CGA TAT CTC CGA CAC ACT CTT   |
| <i>Fasn</i>    | AGA GAC GTG TCA CTC CTG GAC TT  | GCT GCG GAA ACT TCA GAA AAT       |
| <i>Scd1</i>    | CAT CAT TCT CAT GGT CCT GCT     | CCC AGT CGT ACA CGT CAT TTT       |
| <i>Acc</i>     | TGG AGA GCC CCA CAC ACA         | TGA CAG ACT GAT CGC AGA GAA AG    |
| <i>Dgat1</i>   | GTGCACAAGTGGTGCATCAG            | CAGTGGGATCTGAGCCATC               |
| <i>Ppara</i>   | GAG GGT TGA GCT CAG TCA GG      | GGT CAC CTA CGA GTG GCA TT        |
| <i>Cpt1a</i>   | AAA CCC ACC AGG CTA CAG TG      | TCC TTG TAA TGT GCG AGC TG        |
| <i>Lcad</i>    | TCA CCA CAC AGA ATG GGA GA      | ACG CTT GCT CTT CCC AAG TA        |
| <i>Cd36</i>    | AATGGCACAGACGCAGCCT             | GGTTGTCTGGATTCTGGA                |
| <i>F4/80</i>   | CTT TGG CTA TGG GCT TCC AGT C   | GCA AGG AGG ACA GAG TTT ATC GTG   |
| <i>Tnf</i>     | AAG CCT GTA GCC CAC GTC GTA     | GGC ACC ACT AGT TGG TTG TCT TTG   |
| <i>L11b</i>    | CTG AAC TCA ACT GTG AAA TGC CA  | AAA GGT TTG GAA GCA GCC CT        |
| <i>Il6</i>     | CCA CTT CAC AAG TCG GAG GCT TA  | GCA AGT GCA TCA TCG TTG TTC ATA C |
| <i>Tgfb1</i>   | TGA GTG GCT GTC TTT TGA CG      | TCT CTG TGG AGC TGA AGC AA        |
| <i>PAI-1</i>   | TCA GCC CTT GCT TGC CTC AT      | TCA GCC CTT GCT TGC CTC AT        |
| <i>Colla1</i>  | ACG TCC TGG TGA AGT TGG TC      | CAG GGA AGC CTC TTT CTC CT        |
| <i>α-SMA</i>   | TGT GCT GGA CTC TGG AGA TG      | GAA GGA ATA GCC ACG CTC AG        |
| <i>Ccl5</i>    | TGC CCT CAC CAT CAT CCT CAC T   | GGC GGT TCC TTC GAG TGA CA        |
| <i>Il10</i>    | GCT CTT ACT GAC TGG CAT GAG     | CGC AGC TCT AGG AGC ATG TG        |
| <i>Cd163</i>   | GGG TCA TTC AGA GGC ACA CTG     | CTG GCT GTC CTG TCA AGG CT        |
| <i>Cd206</i>   | CAA GGA AGG TTG GCA TTT GT      | CCT TTC AGT CCT TTG CAA GC        |
| <i>Cd209a</i>  | CCT GGG AGA GGA AGA CTG TG      | CTT GCT AGG GCA GGA AGT TG        |
| <i>Chi3l3</i>  | AGA AGG GAG TTT CAA ACC TGG T   | GTC TTG CTC ATG TGT GTA AGT GA    |
| <i>Mgl1</i>    | TGA GAA AGG CTT TAA GAA CTG GG  | GAC CAC CTG TAG TGA TGT GGG       |
| 18S            | AGG CCC AGA GCA AGA GAG GTA     | GGG GTG TTG AAG GTC TCA AAC A     |

**Table S5.** Antibodies used in FACS analysis.

| Antibody                                          |              |
|---------------------------------------------------|--------------|
| PerCP-Cyanine5.5-conjugated NK1.1                 | eBioscience  |
| PerCP-Cyanine5.5-conjugated CD3                   | eBioscience  |
| PerCP-Cyanine5.5-conjugated CD19                  | eBioscience  |
| PerCP-Cyanine5.5-conjugated TER-119               | eBioscience  |
| Allophycocyanin (APC)-eFluor 780-conjugated CD45  | eBioscience  |
| Phycoerythrin (PE)-conjugated CD11c               | eBioscience  |
| eFluor 450-conjugated Ly-6G (Gr-1)                | eBioscience  |
| APC-conjugated CD8                                | eBioscience  |
| eFluor 450-conjugated CD3                         | eBioscience  |
| PE-conjugated NK1.1                               | eBioscience  |
| Fluorescein isothiocyanate (FITC)-conjugated CD45 | eBioscience  |
| PE/Cy7-conjugated F4/80                           | Biolegend    |
| Alexa Fluor 647-conjugated CD206                  | Biolegend    |
| APC-conjugated Ly-6C                              | Biolegend    |
| PE Texas Red-conjugated CD4                       | Abcam        |
| APC-Cy7-conjugated CD11b                          | BD Bioscienc |
| PE-Texas Red-conjugated CD11b                     | Invitrogen   |
